# Supplementary material for: Changes in interleukin-27 levels in patients with acute coronary syndrome and their clinical significance
Source: PeerJ. 2019 Jan 4;7:e5652. doi: 10.7717/peerj.5652 (PMC6322480; doi:10.7717/peerj.5652)
Supplement: Data S1 [file peerj-07-5652-s001.xls]

## Sheet: Sheet1
	IL-27									IL-4
	AMI	UA	SA	control						AMI	UA	SA	control
1	79.15	63.59	139.05	129.55					1	49.69	49.14	84.85	43.89
2	93.69	85.33	126.43	135.85					2	69.15	85.33	56.44	37.22
3	66.57	99.14	109.66	141.77					3	68.57	63.59	79.41	71.93
4	68.05	91.48	132.59	118.83					4	39.55	51.48	52.19	58.2
5	80.52	86.25	104.75	126.72					5	50.42	56.25	54.89	36.27
6	66.91	66.06	119.32	120.38					6	57.91	66.06	79.49	50.19
7	92.37	70.3	130.43	116.92					7	45.37	54.86	80.21	71.55
8	69.55	98.39	111.86	140.83					8	56.05	68.39	55.58	70.45
9	64.31	80.11	119.45	120.67					9	64.31	50.11	59.62	49.58
10	76.19	85.36	129.06	113.79					10	44.19	55.36	83.79	53.21
11	96.05	104.23	101.11	129.64					11	69.55	78.23	55.92	42.9
12	58.05	86.07	120.04	142.03					12	58.05	86.07	86.94	73.16
13	63.96	88.54	135.83	113.21					13	45.96	58.54	54.68	46.69
14	65.19	86.47	115.92	116.41					14	46.68	53.47	65.17	57.14
15	68.39	78.03	118.39	146.2					15	51.28	58.03	58.69	46.32
16	55.03	88.19	122.04	120.52					16	55.03	68.19	82.54	45.88
17	53.25	83.16	95.73	110.03					17	53.25	51.16	85.62	70.58
18	66.1	95.18	125.3	135.96					18	68.1	65.18	55.98	55.01
19	71.28	93.31	119.52	133.72					19	58.39	51.31	69.32	41.3
20		81.19	98.37	117.05					20		61.19	78.56	47.62
21		84.96	101.25						21		64.96	54.06
22		66.15				54.86			22		72.29
23		54.86							23		70.3
24		63.54							24		63.54
25		62.29							25		66.15
average	71.2953	81.6872	117.91	126.504					average	55.3421	62.7672	68.2833	53.4545
	12.3047	13.0396	12.5219	11.1789						9.27305	10.3325	13.1786	12.1418
		IL-17
		AMI	UA	SA	control
	1	157.94	136.08	87.03	79.78
	2	150.37	115.76	96.2	78.29
	3	117.93	139.37	89.14	74.17
	4	136.29	118.32	75.49	78.22
	5	158.01	141.39	69.08	55.9
	6	126.28	117.55	79.05	70.37
	7	149.74	130.17	70.44	76.86
	8	122.88	116.94	91.04	60.25
	9	150.69	109.07	79.08	77.03
	10	128.49	127.38	69.35	68.26
	11	116.92	133.86	81.86	79.02
	12	128.74	108.95	90.36	84.95
	13	109.37	138.06	75.98	73.17
	14	135.59	136.38	71.36	86.33
	15	147.01	130.64	68.25	66.29
	16	123.06	108.43	74.08	60.18
	17	125.89	104.18	85.09	69.32
	18	136.76	106.05	70.47	75.03
	19	157.58	136.97	89.33	83.76
	20		111.45	98.07	72.24
	21		135.94	61.18
	22		133.65
	23		136.79
	24		102.04
	25		147.36
	average	135.765	124.911	79.6157	73.471
		15.291	13.7795	10.2945	8.31545
